# Supplementary material
Source: PubMed Central journal article supplement (PMC6237062)
Supplement: CJN.03170318SupplementaryData.pdf [file CJN.03170318SupplementaryData.pdf]

*Supplemental material is neither peer-reviewed nor thoroughly edited by CJASN. The authors alone are responsible for the accuracy and presentation of the material.*

**Supplement Table 1. ACES Subscale Items**

| Domain                   | Items                                                                                                                                                |
|--------------------------|------------------------------------------------------------------------------------------------------------------------------------------------------|
| Communication Quality    | Thoroughness of doctor's questions about your symptoms and how you are feeling                                                                       |
|                          | Attention doctor gives to what you have to say                                                                                                       |
|                          | Doctor's explanations of your health problems or treatments                                                                                          |
|                          | Doctor's instructions about symptoms to report and when to seek further care                                                                         |
|                          | Doctor's advice and help in making decisions about your care                                                                                         |
|                          | How often do you leave your doctor's office with unanswered questions?                                                                               |
| Whole-person Orientation | Doctor's knowledge of entire medical history                                                                                                         |
|                          | Doctor's knowledge about your responsibilities at work, home or school                                                                               |
|                          | Doctor's knowledge about you as a person (your values and beliefs)                                                                                   |
| Health Promotion         | Did your personal doctor give you the help you wanted to reach or maintain a healthy body weight?                                                    |
|                          | Did your personal doctor talk with you about specific things you could do to improve your health or prevent illness?                                 |
|                          | Did your personal doctor give you the help you needed to make changes in your habits or lifestyle that would improve your health or prevent illness? |
|                          | Did your personal doctor ever ask you about whether your health makes it hard to do the things you need to do each day (such as at work or home)?    |
|                          | Did your personal doctor give the attention you felt you needed to your emotional health and well-being?                                             |
|                          | How often did your personal doctor treat you with respect?                                                                                           |
| Interpersonal Treatment  | How often was your personal doctor caring and kind?                                                                                                  |
|                          | How often did your personal doctor spend enough time with you?                                                                                       |
|                          | How often did you feel you could tell your personal doctor anything, even things you might not tell anyone else?                                     |
| Patient Trust            | How often did you feel that your personal doctor had all the information needed to correctly diagnose and treat your health problems?                |
|                          | How often did your personal doctor put your best interests first when making recommendations about your care?                                        |
|                          |                                                                                                                                                      |

Supplemental material is neither peer-reviewed nor thoroughly edited by CJASN. The authors alone are responsible for the accuracy and presentation of the material.

**Supplemental Table 2.** Association of Low Patient Experience Subscale Scores with Rates of Ambulatory Care-Sensitive Condition Hospitalization\*

|                               | Events (n) | Rate per 100 person-yr | Rate Ratio (95% CI) | Absolute Risk Reduction (95% CI) |
|-------------------------------|------------|------------------------|---------------------|----------------------------------|
| Subscales                     |            |                        | Adjusted            | Adjusted                         |
| Communication Low             | 51         | 9.4                    | 1.25 (0.75, 2.10)   | -0.6 (-4.9, 3.8)                 |
| Communication High            | 40         | 5.1                    | Reference           | --                               |
| Whole Person Orientation Low  | 56         | 7.7                    | 1.10 (0.67, 1.82)   | -0.3 (-4.5, 3.9)                 |
| Whole Person Orientation High | 45         | 6.2                    | Reference           | --                               |
| Health Promotion Low          | 29         | 6.8                    | 1.06 (0.62, 1.81)   | -0.1 (-4.3, 4.0)                 |
| Health Promotion High         | 62         | 6.9                    | Reference           | --                               |
| Interpersonal Treatment Low   | 61         | 10.3                   | 2.38 (1.41, 4.03)   | -2.5 (-7.9, 2.8)                 |
| Interpersonal Treatment High  | 30         | 4.1                    | Reference           | --                               |
| Trust Low                     | 54         | 8.7                    | 1.64 (0.99, 2.71)   | -1.2 (-5.4, 3.0)                 |
| Trust High                    | 37         | 5.3                    | Reference           | --                               |

Adjusted for demographic factors (age, gender, income, education, language), nephrology care and clinical factors (diabetes, hypertension, any cardiovascular disease, KDQOL-36, Beck Depression Inventory score, eGFR, and albuminuria).

\*Hospitalization defined as an ambulatory care-sensitive hospitalization when ICD9 code for one of following conditions was listed as the primary cause of the hospitalization: asthma, angina (without procedure), congestive heart failure, bacterial pneumonia, chronic obstructive pulmonary disease, dehydration, diabetes long-term complications, diabetes short-term complications, hypertension, lower-extremity amputation for individuals with diabetes, perforated appendix, uncontrolled diabetes, and urinary tract infection.

Supplemental material is neither peer-reviewed nor thoroughly edited by CJASN. The authors alone are responsible for the accuracy and presentation of the material.

**Supplemental Table 3.** Association of Low Patient Experience Subscale Scores with All-Cause Hospitalization adjusting for Insurance, Medication Adherence and Time-Updated Systolic BP and HbA1c

| <b>Dichotomized/Quartile</b>         | <b>Model 1</b>             | <b>Model 2</b>             | <b>Model 3</b>             |
|--------------------------------------|----------------------------|----------------------------|----------------------------|
| <b>ACES Domain (separated model)</b> | <b>Rate ratio (95% CI)</b> | <b>Rate ratio (95% CI)</b> | <b>Rate ratio (95% CI)</b> |
| Communication                        | 1.49(1.20, 1.84)           | 1.54(1.23, 1.92)           | 1.6(1.01, 2.53)            |
| Whole person orientation             | 1.06(0.85, 1.31)           | 1.18(0.94, 1.47)           | 1.03(0.65, 1.63)           |
| Health Promotion                     | 1.24(0.99, 1.56)           | 1.22(0.96, 1.56)           | 1.49(0.90, 2.48)           |
| Interpersonal Treatment              | 1.43(1.15, 1.77)           | 1.42(1.14, 1.78)           | 1.54(1.02, 2.32)           |
| Trust                                | 1.53(1.24, 1.90)           | 1.53(1.23, 1.92)           | 1.61(1.06, 2.43)           |

Base model (not shown) includes demographic factors (age, gender, income, education, language), nephrology care and clinical factors (diabetes, hypertension, any cardiovascular disease, KDQOL-36, Beck Depression Inventory score, eGFR, and albuminuria).

Model 1: Base Model plus baseline health insurance

Model 2: Base Model plus baseline medication adherence

Model 3: Base Model plus time-update systolic blood pressure and HbA1c

**Supplemental Table 4.** Association of Low Patient Experience Subscale Scores with All-Cause Hospitalization

| Variables                        | RR (95% CI)          | Variables                                   | RR (95% CI)          | Variables                           | RR (95% CI)          | Variables                                  | RR (95% CI)          | Variables                | RR (95% CI)          |
|----------------------------------|----------------------|---------------------------------------------|----------------------|-------------------------------------|----------------------|--------------------------------------------|----------------------|--------------------------|----------------------|
| <b>Communication Low v. high</b> | 1.54<br>(1.25, 1.90) | <b>Whole Person Orientation Low v. High</b> | 1.20<br>(0.97, 1.47) | <b>Health Promotion Low v. High</b> | 1.31<br>(1.05, 1.62) | <b>Interpersonal Treatment Low v. high</b> | 1.50<br>(1.22, 1.85) | <b>Trust low v. High</b> | 1.57<br>(1.27, 1.93) |
| Age                              | 1.00<br>(0.99, 1.02) | Age                                         | 1.00<br>(0.99, 1.02) | Age                                 | 1.00<br>(0.99, 1.02) | Age                                        | 1.01<br>(0.99, 1.02) | Age                      | 1.01<br>(1.00, 1.02) |
| Sex (F vs M)                     | 1.33<br>(1.07, 1.65) | Sex                                         | 1.31<br>(1.05, 1.63) | Sex                                 | 1.30<br>(1.04, 1.62) | Sex                                        | 1.35<br>(1.09, 1.68) | Sex                      | 1.29<br>(1.04, 1.61) |
| Income (<\$20,000 vs >=\$20,000) | 1.24<br>(0.91, 1.69) | Income                                      | 1.25<br>(0.92, 1.71) | Income                              | 1.27<br>(0.93, 1.73) | Income                                     | 1.22<br>(0.90, 1.66) | Income                   | 1.30<br>(0.96, 1.77) |
| Education (< HS)                 | 0.92<br>(0.72, 1.18) | Education                                   | 0.93<br>(0.73, 1.19) | Education                           | 0.93<br>(0.73, 1.18) | Education                                  | 0.98<br>(0.76, 1.25) | Education                | 0.98<br>(0.77, 1.26) |
| Language (Spanish)               | 0.89<br>(0.66, 1.20) | Language                                    | 0.85<br>(0.64, 1.15) | Language                            | 0.91<br>(0.67, 1.22) | Language                                   | 0.82<br>(0.61, 1.10) | Language                 | 0.84<br>(0.62, 1.14) |
| Diabetes                         | 1.61<br>(1.22, 2.13) | Diabetes                                    | 1.61<br>(1.22, 2.12) | Diabetes                            | 1.65<br>(1.25, 2.18) | Diabetes                                   | 1.69<br>(1.27, 2.24) | Diabetes                 | 1.56<br>(1.18, 2.06) |
| Hypertension                     | 1.19<br>(0.80, 1.75) | Hypertension                                | 1.08<br>(0.73, 1.59) | Hypertension                        | 1.09<br>(0.74, 1.62) | Hypertension                               | 1.05<br>(0.71, 1.56) | Hypertension             | 1.03<br>(0.70, 1.53) |
| Any CVD                          | 1.68<br>(1.35, 2.10) | Any CVD                                     | 1.76<br>(1.41, 2.20) | Any CVD                             | 1.77<br>(1.42, 2.20) | Any CVD                                    | 1.71<br>(1.37, 2.13) | Any CVD                  | 1.71<br>(1.37, 2.13) |
| KDQOL-36 ( Good/Fair/Poor)       | 0.58<br>(0.37, 0.91) | KDQOL-36                                    | 0.65<br>(0.42, 1.00) | KDQOL-36                            | 0.62<br>(0.39, 0.96) | KDQOL-36                                   | 0.64<br>(0.41, 1.00) | KDQOL-36                 | 0.69<br>(0.44, 1.07) |
| BDI (>=11)                       | 1.47<br>(1.19, 1.82) | BDI                                         | 1.59<br>(1.29, 1.96) | BDI                                 | 1.58<br>(1.28, 1.94) | BDI                                        | 1.52<br>(1.23, 1.87) | BDI                      | 1.52<br>(1.23, 1.88) |
| eGFR                             | 1.02<br>(1.01, 1.03) | eGFR                                        | 1.02<br>(1.01, 1.03) | eGFR                                | 1.02<br>(1.01, 1.03) | eGFR                                       | 1.02<br>(1.01, 1.03) | eGFR                     | 1.02<br>(1.01, 1.03) |
| albuminuria                      | 1.06<br>(0.84, 1.35) | Albuminuria                                 | 1.13<br>(0.89, 1.44) | albuminuria                         | 1.13<br>(0.89, 1.44) | albuminuria                                | 1.07<br>(0.84, 1.36) | albuminuria              | 1.10<br>(0.86, 1.40) |
| Nephrology care                  | 1.05<br>(0.85, 1.30) | Nephrology care                             | 1.05<br>(0.85, 1.31) | Nephrology care                     | 1.07<br>(0.87, 1.33) | Nephrology care                            | 1.06<br>(0.86, 1.32) | Nephrology care          | 1.05<br>(0.85, 1.29) |

**Supplemental Table 5. Association of Low Patient Experience Subscale Scores with ESKD Risk**

| <b>Variables</b>                 | <b>HR (95% CI)</b> | <b>Variables</b>                            | <b>HR (95% CI)</b> | <b>Variables</b>                    | <b>HR (95% CI)</b> | <b>Variables</b>                           | <b>HR (95% CI)</b> | <b>Variables</b>         | <b>HR (95% CI)</b> |
|----------------------------------|--------------------|---------------------------------------------|--------------------|-------------------------------------|--------------------|--------------------------------------------|--------------------|--------------------------|--------------------|
| <b>Communication Low v. high</b> | 1.58(0.93-2.71)    | <b>Whole Person Orientation Low v. High</b> | 1.01(0.59-1.71)    | <b>Health Promotion Low v. High</b> | 1.32(0.74-2.37)    | <b>Interpersonal Treatment Low v. high</b> | 1.15(0.68-1.94)    | <b>Trust low v. High</b> | 1.25(0.74-2.11)    |
| Age                              | 0.96(0.94-0.99)    | Age                                         | 0.96(0.94-0.99)    | Age                                 | 0.96(0.94-0.99)    | Age                                        | 0.97(0.94-0.99)    | Age                      | 0.97(0.94-0.99)    |
| Sex (F vs M)                     | 0.79(0.45-1.38)    | Sex                                         | 0.77(0.43-1.36)    | Sex                                 | 0.76(0.43-1.34)    | Sex                                        | 0.78(0.44-1.38)    | Sex                      | 0.79(0.45-1.4)     |
| Income (<\$20,000 vs >=\$20,000) | 2.03(0.93-4.46)    | Income                                      | 1.97(0.91-4.28)    | Income                              | 1.95(0.9-4.23)     | Income                                     | 1.94(0.9-4.2)      | Income                   | 1.98(0.92-4.27)    |
| Education (< HS)                 | 0.68(0.37-1.23)    | Education                                   | 0.71(0.39-1.27)    | Education                           | 0.7(0.39-1.26)     | Education                                  | 0.7(0.39-1.26)     | Education                | 0.72(0.4-1.3)      |
| Language (Spanish)               | 1.35(0.67-2.7)     | Language                                    | 1.38(0.68-2.77)    | Language                            | 1.43(0.71-2.87)    | Language                                   | 1.35(0.67-2.72)    | Language                 | 1.34(0.67-2.69)    |
| Diabetes                         | 4.88(2.02-11.8)    | Diabetes                                    | 4.66(1.94-11.18)   | Diabetes                            | 4.89(2.03-11.77)   | Diabetes                                   | 4.63(1.94-11.09)   | Diabetes                 | 4.85(2.02-11.64)   |
| Hypertension                     | 2.53(0.7-9.19)     | Hypertension                                | 2.07(0.59-7.26)    | Hypertension                        | 2.35(0.65-8.5)     | Hypertension                               | 2.16(0.61-7.63)    | Hypertension             | 2.26(0.63-8.04)    |
| Any CVD                          | 0.54(0.3-0.98)     | Any CVD                                     | 0.61(0.34-1.09)    | Any CVD                             | 0.63(0.35-1.12)    | Any CVD                                    | 0.58(0.32-1.06)    | Any CVD                  | 0.57(0.31-1.03)    |
| KDQOL-36 ( Good/Fair/Poor)       | 0.29(0.05-1.48)    | KDQOL-36                                    | 0.31(0.06-1.55)    | KDQOL-36                            | 0.29(0.06-1.47)    | KDQOL-36                                   | 0.31(0.06-1.58)    | KDQOL-36                 | 0.29(0.06-1.5)     |
| BDI (>=11)                       | 0.55(0.31-0.96)    | BDI                                         | 0.6(0.34-1.06)     | BDI                                 | 0.6(0.34-1.04)     | BDI                                        | 0.6(0.34-1.05)     | BDI                      | 0.61(0.35-1.07)    |
| eGFR                             | 0.9(0.87-0.93)     | eGFR                                        | 0.91(0.88-0.94)    | eGFR                                | 0.91(0.88-0.93)    | eGFR                                       | 0.91(0.88-0.94)    | eGFR                     | 0.91(0.88-0.94)    |
| albuminuria                      | 5.84(2.27-15.04)   | albuminuria                                 | 5.88(2.26-15.31)   | albuminuria                         | 6.14(2.37-15.88)   | albuminuria                                | 5.89(2.29-15.19)   | albuminuria              | 5.99(2.31-15.51)   |

**Supplemental Table 6. Association of Low Patient Experience Subscale Scores with Mortality Risk**

|                  | <b>Variables</b>                 | <b>HR (95% CI)</b> | <b>Variables</b>                            | <b>HR (95% CI)</b> | <b>Variables</b>                    | <b>HR (95% CI)</b> | <b>Variables</b>                           | <b>HR (95% CI)</b> | <b>Variables</b>         | <b>HR (95% CI)</b> |
|------------------|----------------------------------|--------------------|---------------------------------------------|--------------------|-------------------------------------|--------------------|--------------------------------------------|--------------------|--------------------------|--------------------|
| <b>Mortality</b> | <b>Communication Low v. high</b> | 0.9(0.45-1.82)     | <b>Whole Person Orientation Low v. High</b> | 0.87(0.43-1.78)    | <b>Health Promotion Low v. High</b> | 0.62(0.27-1.44)    | <b>Interpersonal Treatment Low v. high</b> | 0.81(0.4-1.64)     | <b>Trust low v. High</b> | 0.92(0.47-1.79)    |
|                  | Age                              | 1.02(0.99-1.06)    | Age                                         | 1.02(0.99-1.06)    | Age                                 | 1.02(0.99-1.06)    | Age                                        | 1.02(0.98-1.06)    | Age                      | 1.02(0.99-1.06)    |
|                  | Sex (F vs M)                     | 1.12(0.56-2.24)    | Sex                                         | 1.12(0.56-2.23)    | Sex                                 | 1.12(0.56-2.22)    | Sex                                        | 1.1(0.55-2.2)      | Sex                      | 1.13(0.57-2.25)    |
|                  | Income (<\$20,000 vs >=\$20,000) | 0.94(0.37-2.41)    | Income                                      | 0.96(0.37-2.46)    | Income                              | 0.99(0.39-2.53)    | Income                                     | 0.97(0.38-2.48)    | Income                   | 0.93(0.36-2.36)    |
|                  | Education (< HS)                 | 1.42(0.6-3.37)     | Education                                   | 1.42(0.6-3.37)     | Education                           | 1.4(0.59-3.31)     | Education                                  | 1.42(0.6-3.37)     | Education                | 1.41(0.59-3.37)    |
|                  | Language (Spanish)               | 0.72(0.27-1.94)    | Language                                    | 0.74(0.27-1.98)    | Language                            | 0.69(0.25-1.87)    | Language                                   | 0.75(0.28-2.03)    | Language                 | 0.73(0.27-1.97)    |
|                  | Diabetes                         | 1.6(0.59-4.37)     | Diabetes                                    | 1.58(0.58-4.35)    | Diabetes                            | 1.5(0.54-4.14)     | Diabetes                                   | 1.57(0.57-4.28)    | Diabetes                 | 1.61(0.59-4.41)    |
|                  | Hypertension                     | 0.56(0.15-2.16)    | Hypertension                                | 0.57(0.15-2.14)    | Hypertension                        | 0.53(0.14-1.99)    | Hypertension                               | 0.57(0.15-2.17)    | Hypertension             | 0.57(0.15-2.17)    |
|                  | Any CVD                          | 1.53(0.75-3.11)    | Any CVD                                     | 1.49(0.73-3.02)    | Any CVD                             | 1.48(0.73-3.01)    | Any CVD                                    | 1.53(0.76-3.11)    | Any CVD                  | 1.52(0.75-3.1)     |
|                  | KDQOL-36 ( Good/Fair/Poor)       | 0.49(0.1-2.47)     | KDQOL-36                                    | 0.48(0.1-2.41)     | KDQOL-36                            | 0.53(0.1-2.66)     | KDQOL-36                                   | 0.48(0.1-2.38)     | KDQOL-36                 | 0.48(0.09-2.39)    |
|                  | BDI (>=11)                       | 1.71(0.84-3.49)    | BDI                                         | 1.67(0.83-3.37)    | BDI                                 | 1.69(0.83-3.44)    | BDI                                        | 1.72(0.85-3.47)    | BDI                      | 1.69(0.84-3.39)    |
|                  | eGFR                             | 0.99(0.95-1.02)    | eGFR                                        | 0.98(0.95-1.02)    | eGFR                                | 0.99(0.95-1.02)    | eGFR                                       | 0.99(0.95-1.02)    | eGFR                     | 0.98(0.95-1.02)    |
|                  | albuminuria                      | 2.06(0.87-4.86)    | albuminuria                                 | 2.01(0.85-4.77)    | albuminuria                         | 1.99(0.84-4.73)    | albuminuria                                | 2.07(0.88-4.9)     | albuminuria              | 2.04(0.87-4.79)    |
